# Supplementary material for: Connective tissue disease related interstitial lung diseases and idiopathic pulmonary fibrosis: provisional core sets of domains and instruments for use in clinical trials
Source: PubMed Central journal article supplement — Thorax. 2013 Dec 24;69(5):436–44. doi: 10.1136/thoraxjnl-2013-204202 (PMC3995282; doi:10.1136/thoraxjnl-2013-204202), 2013-12-24
Supplement: thoraxjnl-2013-204202-s1.pdf [file thoraxjnl-2013-204202-s1.pdf]

## ON-LINE SUPPLEMENTARY MATERIAL FOR NGT PROCEEDINGS

This supplement expands on the details and voting results of the NGT process. The voting items and results reflect end-products of an iterative process that took place over three years. The Delphi process enlisted the wide participation of the ILD medical expert community of pulmonary and rheumatology specialists, with support from an advisory panel of pathologists and radiologists to identify domains and produce a list of instruments with which to measure these domains that are acceptable to the greater community of ILD experts. **Patient Participation:** In order to proceed with the stages beyond the Delphi, patient perspective of ILD was factored into the results of the Delphi process based on focus groups with 45 patients with CTD-ILD and the results of a prior study with 20 patients with IPF (conducted by: Swigris JJ, et al. Patients' perspectives on how idiopathic pulmonary fibrosis affects the quality of their lives. Health Qual Life Outcomes. 2005).

### I. NGT Participation:

Voting at the NGT was done through a pre-programmed automated response system which collected voting responses onto a computer hard drive and grouped according to participant type. Fourteen pulmonary specialists, 16 rheumatology specialists, 2 radiologists and 6 CTD-ILD patient partners and 2 IPF patient partners were invited to participate with following participants in actual attendance (of which 10 pulmonary, 12 rheumatology and 1 radiology specialist participated with ultimately a patient representing each IPF, IIM-ILD, RA-ILD and SSc-ILD participating):

**Patient Research Partners:** Diseases represented were IPF, RA-ILD, IIM-ILD and SSc-ILD. Several patients had clinical trial experience. All patients had the experience of oxygen dependency. Three had disease severe enough to have either received or are being considered for transplantation.

Robert Hedlund

Karen Nichols

Catherine Sarver

Pieter van den Assum

Daphne LeSage (involved in the development of the NGT proceedings but unable to attend due to inclement weather resulting in airport closure)

### Pulmonary ILD Specialists:

Katerina Antoniou

Robert P. Baughman

Kevin K. Brown

Kevin Flaherty

Kristin B. Highland (Trained in Rheumatology)

Dong Soon Kim

Luca Richeldi

Jay H. Ryu

Jeffrey Swigris

Athol Wells

### Rheumatology Specialists:

Paul F. Dellaripa

Oliver Distler

Aryeh Fischer

Dinesh Khanna

Eric L. Matteson

Peter A. Merkel

Frederick W. Miller

Shikha Mittoo

Chester V. Oddis

Susanna Proudman

James R. Seibold

Vibeke Strand

### Radiology ILD Specialist:

David Lynch (Trained in internal medicine and radiology, his votes were attributed to the Pulmonary Specialty Group, thus tabulated for both IPF and CTD-ILD)

**Convener/Organiser/Methods Supervisor/Patient Educational Sessions:** Lesley Ann Saketkoo

**Moderation:** Peter A. Merkel, Oliver Distler

**II. Domain Teams:**

**DYSPNEA:**

Robert P. Baughman  
Kevin Flaherty  
Dinesh Khanna  
Catherine Sarver

**COUGH:**

Robert P. Baughman  
Shikha Mittoo  
Daphne LeSage  
Jeffrey Swigris

**HRQoL:**

Aryeh Fischer  
Kevin Flaherty  
Dinesh Khanna  
Peter A. Merkel  
Karen Nichols  
Susanna Proudman  
Vibeke Strand  
Jeffrey Swigris

**LUNG PHYSIOLOGY:**

Kevin Flaherty  
Kristin B. Highland  
Dong Soon Kim  
Otylia Kowal-Bielecka  
Frederick W. Miller  
Susanna Proudman  
Jay H. Ryu

**LUNG IMAGING:**

Katerina Antoniou  
Oliver Distler  
David Lynch  
Jay H. Ryu  
Athol U. Wells

**SURVIVAL:**

Kevin K. Brown  
Paul F. Dellaripa  
Robert Hedlund  
Eric L. Matteson  
Athol U. Wells

**MEDICATIONS:**

Chester V. Oddis  
James R. Seibold  
Vibeke Strand

**DOMAIN TEAMS Oversight:** Lesley Ann Saketkoo

### III. OMERACT (Outcome Measures in Rheumatology [initially ‘for Clinical Trials’ though this is no longer part of the official title])

**Background:** OMERACT is an international non-profit organization established in 1992 dedicated to the identification and development of appropriate outcome measures in disease. OMERACT provides a home for many disease-based working groups investigating outcome measures for use in clinical trials. OMERACT has characterized validity in terms of a ‘filter’ that provides an organizational checklist for an instrument’s ability to satisfy accepted components of validity.

**Filter:** The components of the filter are grouped under three main criteria: truth, discrimination and feasibility. While the ideal instrument would satisfy all three criteria completely, it is recognized that many useful instruments do not. The filter serves as a guide to identifying the degree to which instruments have demonstrated validity.

#### Glossary of Terms/Properties comprised in the OMERACT Filter:

##### Truth:

**Face Validity:** The instrument hypothetically or at ‘face value’ makes sense; usually brings the instrument into consideration for study.

**Content Validity:** The instrument has demonstrated ability to measure the intended concept/domain; i.e. the substance of a measure is acknowledged to reflect a concept /domain well in regards to relevant content and comprehension for a specific disease. This may be gleaned from prior studies or active presentation to and/or item collection from medical experts and/or patients.

**Construct Validity:** The instrument has been applied in real world setting and demonstrates confirmatory relationships with other accepted measures for that disease – whether the relations are convergent (correlative when anticipated to be so) or divergent (non-correlative when anticipated not to be so) with other accepted outcome measures in that disease. This operational step provides confirmation for further investigation of the instrument.

**Criterion Validity:** The values provided by the instrument correlate with or predict results of the accepted ‘gold standard’ for that disease.

##### Discrimination:

**Discrimination:** The instrument has demonstrated ability to be responsive to changes for the intended concept/domain; while remaining sufficiently unresponsive to other like or confounding situations.

**Reliability:** The instrument demonstrates reproducibility and, importantly, accurate values over multiple measurements.

**Sensitivity to Change:** The values of the instrument demonstrate incremental results that either positively or negatively correlate with changes of the disease over time; e.g. while an instrument may have tremendous diagnostic value, it may not be useful to monitor the course of a disease.

**Feasibility:** Focuses on logistical and practical implementation and is often the deciding factor on the utility of an instrument.

**Interpretability:** Analysis/computation of results is sufficiently straightforward and undemanding so as not to introduce potential errors or hardship in implementation or interpretation of results.

**Accessibility:** There is little or no impediment to the instrument being commonly (or potentially) available for use; and the financial costs and time burden of obtaining, implementation and interpretation of the instrument does not impose unusual hardship.

**Safety:** The instrument poses little or no risk to patients or personnel implementing the measure.

#### IV. Post-Delphi Introduction of Items

| Domain or Instrument Introduced                                                                                            | Support for Post-Delphi Introduction                                                                                                                                                                                                    |
|----------------------------------------------------------------------------------------------------------------------------|-----------------------------------------------------------------------------------------------------------------------------------------------------------------------------------------------------------------------------------------|
| Domain of <i>Cough</i>                                                                                                     | Substantiated by Patient Perspective in both CTD-ILD and IPF (Swigris et al).                                                                                                                                                           |
| Instrument of Leicester Cough Questionnaire (LCQ) as a measure of <i>Cough</i>                                             | Identified by comparative analysis by <i>Cough</i> domain team, discussion and Delphi voting as the most appropriate measure to supply an instrument under cough.                                                                       |
| Instrument of Mahler Dysnea Index (MDI) as measure of <i>Dyspnea</i>                                                       | Identified by updated literature review and voted upon as having substantive findings warranting NGT discussion and voting. Exclusion of this item was collectively viewed as injurious to fair representation of post-Delphi evidence. |
| Instrument of University of California San Diego Shortness of Breath Questionnaire (UCSD-SBQ) as measure of <i>Dyspnea</i> | Identified by updated literature review and voted upon as having substantive findings warranting NGT discussion and voting. Exclusion of this item was collectively viewed as injurious to fair representation of post-Delphi evidence. |
| The concepts of <i>Fatigue, Participation, Physical Function, Self-care</i> and <i>Sleep</i>                               | These concepts were identified as important in Patient Perspective studies. It was agreed that disease-specific investigations into HRQoL would incorporate these components.                                                           |
| The measure of All Cause Mortality as a measure of <i>Survival</i>                                                         | Identified as an important generic identifier of death in clinical trials.                                                                                                                                                              |
|                                                                                                                            |                                                                                                                                                                                                                                         |

**V. VOTING RESULTS:**

For the following series of tables the purple shaded columns are the total responses of the groups appropriated to IPF or to CTD-ILD. While the pink shaded columns are the individual groups whose votes are appropriated to the total accepted votes. Acceptance was agreed upon a priori as  $\geq 70\%$  with the following tabulations: **IPF Voting:** Pulmonary Specialists + IPF Patient Partners

**CTD-ILD Voting:** Pulmonary Specialists + Rheumatology Specialists + CTD-ILD Patient Partners

**Dyspnea IPF**

| Instrument                          |          | Total for Acceptance | Pulms                                | IPF Patient |
|-------------------------------------|----------|----------------------|--------------------------------------|-------------|
| Dyspnea 12                          |          | 70% (7/10)           | 67% (6/9)                            | 100% (1/1)  |
| MRC                                 |          | 92% (11/12)          | 91% (10/11)                          | 100% (1/1)  |
| UCSD                                |          | 80% (8/10)           | 78% (7/9)                            | 100% (1/1)  |
| Borg                                |          | 36% (4/11)           | 40% (4/10)                           | 0% (0/1)    |
| Possible Secondary End-Point        |          | 82% (9/11)           | 80% (8/10)                           | 100% (1/1)  |
| Need New Patient Derived Instrument |          | 73% (8/11)           | 70% (7/10)                           | 100% (1/1)  |
| Dyspnea 12 to be further evaluated  | RESEARCH | 100% 23/23           | Show of Hands Voting from All Groups |             |

**Dyspnea CTD-ILD**

| Instrument                          |          | Total for Acceptance | Pulms                                | Rheums       | All Physicians | CTD ILD Patients |
|-------------------------------------|----------|----------------------|--------------------------------------|--------------|----------------|------------------|
| Dyspnea 12                          |          | 88% (22/25)          | 80% (8/10)                           | 92% (11/12)  | 86% (19/22)    | 100% (3/3)       |
| MRC                                 |          | 75% (18/24)          | 78% (7/9)                            | 75% (9/12)   | 76% (16/21)    | 66% (2/3)        |
| Borg                                |          | 32% (8/25)           | 30% (3/10)                           | 33% (4/12)   | 32% (7/22)     | 33% (1/3)        |
| MDI                                 |          | 58% (14/24)          | 40% (4/10)                           | 67% (8/12)   | 55% (12/22)    | 100% (2/2)       |
| MDI for SSc                         |          | 54% (13/24)          | 50% (5/10)                           | 55% (6/11)   | 52% (11/21)    | 66% (2/3)        |
| Possible Secondary End-Point        |          | 96% (24/25)          | 90% (9/10)                           | 100% (12/12) | 95% (21/22)    | 100% (3/3)       |
| Need New Patient Derived Instrument |          | 76% (19/25)          | 70% (7/10)                           | 92% (11/12)  | 82% (18/22)    | 33% (1/3)        |
| MDI for future study                | RESEARCH | 91% 21/23            | Show of Hands Voting from All Groups |              |                |                  |

### Cough in IPF

| Instrument                                          |  | Total for Acceptance         | Pulms      | IPF Patient |
|-----------------------------------------------------|--|------------------------------|------------|-------------|
| Leicester Cough Questionnaire as Interim Instrument |  | 82% (9/11)                   | 80% (8/10) | 100% (1/1)  |
| Possible Secondary End-Point                        |  | Agreement without dissension |            |             |
| Need New Patient Derived Instrument                 |  | 73% (8/11)                   | 70% (7/10) | 100% (1/1)  |

### Cough in CTD ILD

| Instrument                                          |  | Total for Acceptance          | Pulms      | Rheums      | All Physicians | CTD ILD Patients |
|-----------------------------------------------------|--|-------------------------------|------------|-------------|----------------|------------------|
| Leicester Cough Questionnaire as Interim Instrument |  | 79% (19/24)                   | 70% (7/10) | 83% (10/12) | 77% (17/22)    | 100% (2/2)       |
| Possible Secondary End-Point                        |  | Agreement without dissension. |            |             |                |                  |
| Need New Patient Derived Instrument                 |  | 64% (16/25)                   | 60% (6/10) | 75% (9/12)  | 68% (15/22)    | 33% (1/3)        |

**Patient Global Assessment of Disease Activity in IPF**

| Instrument                                |          | Total for Acceptance | Pulms                                | IPF Patient |
|-------------------------------------------|----------|----------------------|--------------------------------------|-------------|
| Pt-GA                                     |          | 64% (7/11)           | 60% (6/10)                           | 100% (1/1)  |
| Possible Secondary End-Point              |          | 90% (9/10)           | 89% (8/9)                            | 100% (1/1)  |
| 10mm Change is Clinically Meaningful      |          | 30% (3/10)           | 22% (2/9)                            | 100% (1/1)  |
| PtGA further evaluated as Outcome Measure | RESEARCH | 100% 23/23           | Show of Hands Voting from all Groups |             |

**Patient Global Assessment of Disease Activity in CTD ILD**

| Instrument                           |  | Total for Acceptance | Pulms        | Rheums       | All Physicians | CTD ILD Patients |
|--------------------------------------|--|----------------------|--------------|--------------|----------------|------------------|
| Pt-GA                                |  | 96% (23/24)          | 100% (10/10) | 92% (11/12)  | 95% (21/22)    | 100% (2/2)       |
| Possible Secondary End-Point         |  | 92% (23/25)          | 80% (8/10)   | 100% (12/12) | 91% (20/22)    | 100% (3/3)       |
| 10mm Change is Clinically Meaningful |  | 71% (17/24)          | 50% (5/10)   | 83% (10/12)  | 68% (15/22)    | 100 (2/2)        |

### Health Related Quality of Life in IPF

| Instrument                          |  | Total for Acceptance | Pulms        | IPF Patient |
|-------------------------------------|--|----------------------|--------------|-------------|
| SF-36                               |  | 82% (9/11)           | 80% (8/10)   | 100% (1/1)  |
| SGRQ                                |  | 82% (9/11)           | 80% (8/10)   | 100% (1/1)  |
|                                     |  |                      |              |             |
| Possible Secondary End-Point        |  | 100% (11/11)         | 100% (10/10) | 100% (1/1)  |
|                                     |  |                      |              |             |
| Need New Patient Derived Instrument |  | 90% (9/10)           | 90% (9/10)   | Not Voted   |

### Health Related Quality of Life in CTD ILD

| Instrument                          |  | Total for Acceptance | Pulms        | Rheums       | All Physicians | CTD ILD Patients |
|-------------------------------------|--|----------------------|--------------|--------------|----------------|------------------|
| SF-36                               |  | 100% (24/24)         | 100% (10/10) | 100% (11/11) | 100% (21/21)   | 100% (3/3)       |
| SGRQ                                |  | 87% (20/23)          | 90% (9/10)   | 82% (9/11)   | 86% (18/21)    | 100% (2/2)       |
|                                     |  |                      |              |              |                |                  |
| HAQ-DI                              |  | 54% (13/24)          | 30% (3/10)   | 64% (7/11)   | 48% (10/21)    | 100% (3/3)       |
|                                     |  |                      |              |              |                |                  |
| Possible Secondary End-Point        |  | 100% (24/24)         | 100% 10/10   | 100% (11/11) | 100% (21/21)   | 100% (3/3)       |
|                                     |  |                      |              |              |                |                  |
| Need New Patient Derived Instrument |  | 100% (22/22)         | 100% (8/8)   | 100% (11/11) | 100% (19/19)   | 100% (3/3)       |



**Lung Imaging:** During the NGT, it was proposed by the Lung Imaging Team and agreed upon by the assembled group, that overall extent of disease in IPF is fibrosis and honey-combing while ground glass opacities in CTD-ILD is an uncertain pattern and based on available evidence, it was therefore adopted to proceed directly with *Overall Extent of Disease of HRCT* as the single voting item. Note: regarding an end-point for *Overall Extent of Disease on HRCT* in CTD-ILD, no voting option reached the voting threshold of 70%.

### Lung Imaging in IPF

| Instrument                                             |  | Total for Acceptance | Pulms        | IPF Patient |
|--------------------------------------------------------|--|----------------------|--------------|-------------|
| Overall Extent of Lung Disease on HRCT                 |  | 100% (1/11)          | 100% (10/10) | 100% (1/1)  |
| Possible Primary End-Point                             |  | 8% (1/12)            | 9% (1/11)    | 0% (0/1)    |
| Possible Secondary End-Point                           |  | 33% (4/12)           | 27% (3/11)   | 100% (1/1)  |
|                                                        |  |                      |              |             |
| Endpoint Perceived as Difficult to Assign At This Time |  | 58% (7/12)           | 64% (7/11)   | 0% (0/1)    |
| End-Point                                              |  | NONE                 |              |             |

### Lung Imaging in CTD ILD

| Instrument                                             |  | Total for Acceptance | Pulms        | Rheums     | All Physicians | CTD ILD Patients |
|--------------------------------------------------------|--|----------------------|--------------|------------|----------------|------------------|
| Overall Extent of Lung Disease on HRCT                 |  | 92% (23/25)          | 100% (11/11) | 82% (9/11) | 91% (20/22)    | 100% (3/3)       |
| Possible Primary Endpoint                              |  | 0% (0/23)            | 0% (0/11)    | 0% (0/10)  | 0% (0/21)      | 0% (0/2)         |
| Possible Secondary Endpoint                            |  | 65% (15/23)          | 45% (5/11)   | 80% (8/10) | 62% (13/21)    | 100% (2/2)       |
|                                                        |  |                      |              |            |                |                  |
| Endpoint Perceived as Difficult to Assign At This Time |  | 35% (8/23)           | 55% (6/11)   | 20% (2/10) | 38% (8/21)     | 0% (0/2)         |
| End Point                                              |  | NONE                 |              |            |                |                  |

### Lung Physiology / Function in IPF

| Instrument                          |  | Total for Acceptance | Pulms        | IPF Patient |
|-------------------------------------|--|----------------------|--------------|-------------|
| FVC                                 |  | 100% (11/11)         | 100% (10/10) | 100% (1/1)  |
| FVC as Possible Primary Endpoint    |  | 82% (9/11)           | 80% (8/10)   | 100% (1/1)  |
|                                     |  |                      |              |             |
| DLCO                                |  | 100% (11/11)         | 100% (10/10) | 100% (1/1)  |
| DLCO as Possible Secondary Endpoint |  | 91% (10/11)          | 90% (9/10)   | 100% (1/1)  |
|                                     |  |                      |              |             |
| Supplemental O2                     |  | 0% (0/11)            | 0% (0/10)    | 0% (0/1)    |
| 6MWT Max Desat                      |  | 45% (5/11)           | 40% (4/10)   | 100% (1/1)  |
| 6MWT Distance                       |  | 45% (5/11)           | 40% (4/10)   | 100% (1/1)  |

### Lung Physiology / Function in CTD-ILD

| Instrument                          |  | Total for Acceptance | Pulms        | Rheums       | All Physicians | CTD-ILD Patients |
|-------------------------------------|--|----------------------|--------------|--------------|----------------|------------------|
| FVC                                 |  | 100% (24/24)         | 100% (10/10) | 100% (11/11) | 100% (21/21)   | 100% (3/3)       |
| FVC as Possible Primary Endpoint    |  | 88% (21/24)          | 80% (8/10)   | 100% (11/11) | 90% (19/21)    | 67% (2/3)        |
|                                     |  |                      |              |              |                |                  |
| DLCO                                |  | 100% (21/23)         | 100% (10/10) | 80% (8/10)   | 90% (18/20)    | 100% (3/3)       |
| DLCO as Possible Secondary Endpoint |  | 87% (20/23)          | 89% (8/9)    | 91% (10/11)  | 90% (18/20)    | 67% (2/3)        |
|                                     |  |                      |              |              |                |                  |
| Supplemental O2                     |  | 4% (1/23)            | 0% (0/10)    | 10% (1/10)   | 5% (1/20)      | 0% (0/3)         |
| 6MWT Max Desat                      |  | 42% (10/24)          | 40% (4/10)   | 36% (4/11)   | 38% (8/21)     | 67% (2/3)        |

**Survival:** During the NGT, it was proposed by the Survival Team and agreed upon by the assembled group, that *Time to Death* and *Progression Free Survival* in both IPF and CTD-ILD should immediately be tabled to *Research Agenda*, there was no dissension to this. The group opted to proceed, upon advisement of the Survival Team, directly to *All Cause Mortality* and *FVC as a Surrogate Endpoint for Survival* as the voting items.

#### Survival in IPF

| Instrument                                         |          | Total for Acceptance | Pulms        | IPF Patient |
|----------------------------------------------------|----------|----------------------|--------------|-------------|
| All Cause Mortality as a Secondary Endpoint        |          | 92% (11/12)          | 100% (11/11) | 0% (0/1)    |
| All Cause Mortality as a Possible Primary Endpoint |          | 25% (3/12)           | 18% (2/11)   | 100% (1/1)  |
| FVC as Surrogate Endpoint for Survival             |          | 45% (5/11)           | 40% (4/10)   | 100% (1/1)  |
| Time to Death                                      | RESEARCH |                      |              |             |
| Progression Free Survival                          | RESEARCH |                      |              |             |

#### Survival in CTD-ILD

| Instrument                                         |                 | Total for Acceptance | Pulms        | Rheums      | All Physicians | CTD-ILD Patients |
|----------------------------------------------------|-----------------|----------------------|--------------|-------------|----------------|------------------|
| All Cause Mortality as a Secondary Endpoint        |                 | 92% (23/25)          | 100% (11/11) | 91% (10/11) | 95% (21/22)    | 67% (2/3)        |
| All-Cause Mortality as a Possible Primary Endpoint |                 | 0% (0/25) (1/1)      | 0% (0/11)    | 0% (0/11)   | 0% (0/22)      | 0% (0/3)         |
| FVC as a Surrogate End-Point for Survival          |                 | 33% (8/24)           | 30% (3/10)   | 27% (3/11)  | 29% (6/21)     | 67% (2/3)        |
| Progression Free Survival                          | RESEARCH AGENDA |                      |              |             |                |                  |

#### Additional questions posed at the NGT Meeting:

Do you think that the CTD-ILD OMERACT group should recommend the collection of bio-samples (according to published guidelines such as the EULAR-EUSTAR biomarker guidelines) in any multicentre RCT in IPF and CTD-ILD? 23/23 Yes by Vote of Hands From All Groups.

The Instruments accepted by the NGT are approved as research agenda items. 23/23 Yes by Vote of Hands From All Groups.

## VI. Further References

- American Thoracic Society/European Respiratory Society International Multidisciplinary Consensus Classification of the Idiopathic Interstitial Pneumonias. *Am J Respir Crit Care Med* 2002;165(2): 277-304.
- An official ATS/ERS/JRS/ALAT statement: idiopathic pulmonary fibrosis: evidence-based guidelines for diagnosis and management. *Am J Respir Crit Care Med*. 2011; 183(6):788-824.
- Bajwah S, Ross JR, Peacock JL, et al. Interventions to improve symptoms and quality of life of patients with fibrotic interstitial lung disease: a systematic review of the literature. *Thorax*. 2013;68(9):867-79.
- Bartlett SJ, Hewlett S, Bingham CO 3rd, et al. The OMERACT RA Flare Working Group. Identifying core domains to assess flare in rheumatoid arthritis: an OMERACT international patient and provider combined Delphi consensus. *Ann Rheum Dis*. 2012;71(11):1855-1860.
- Beretta L, Santaniello A, Lemos A, et al. Validity of the Saint George's Respiratory Questionnaire in the evaluation of the health-related quality of life in patients with interstitial lung disease secondary to systemic sclerosis. *Rheumatology (Oxford)*. 2007; 46(2):296-301.
- Beyer C, Distler JH, Allanore Y, et al. EUSTAR Biobanking Group. EUSTAR biobanking: recommendations for the collection, storage and distribution of biospecimens in scleroderma research. *Ann Rheum Dis*. 2011;70(7):1178-82.
- Birring SS, Prudon B, Carr AJ, et al. Development of a symptom specific health status measure for patients with chronic cough: Leicester Cough Questionnaire (LCQ). *Thorax*. 2003 Apr;58(4):339-43.
- Boers M, Brooks P, Strand V, et al. The OMERACT filter for outcome measures in rheumatology. *J Rheumatol* 1998; 25:2198-9.
- Bottomley A, Jones D, Claassens L. Patient-reported outcomes: assessment and current perspectives of the guidelines of the Food and Drug Administration and the reflection paper of the European Medicines Agency. *Eur J Cancer*. 2009;45(3):347-53.
- Collard HR, King TE Jr, Bartelson BB, et al. Changes in clinical and physiologic variables predict survival in idiopathic pulmonary fibrosis. *Am J Respir Crit Care Med* 2003;168:538–542.
- Corbin J, Strauss A. (3rd Edition) *Basics of Qualitative Research - Techniques and Procedures for Developing Grounded Theory*. California, Sage. 2008.
- Corte TJ, Goh NS, Glaspole IN, et al. Idiopathic pulmonary fibrosis: is all-cause mortality a practical and realistic end-point for clinical trials? *Thorax*. 2013 Jan 23 [Epub ahead of print].
- Cottin V, Capron F, Grenier P, et al. Diffuse idiopathic interstitial pneumonias. International multidisciplinary consensus classification by the American Thoracic Society and the European Respiratory Society, principal clinico-pathological entities, and diagnosis. *Rev Mal Respir* 2004; 21: 299-318.

- de Lauretis A, Veeraraghavan S, Renzoni E. Review series: Aspects of interstitial lung disease: connective tissue disease-associated interstitial lung disease: how does it differ from IPF? How should the clinical approach differ? *Chron Respir Dis* 2011; 8: 53-82.
- Distler O, Behrens F, Huscher D, et al. Need for improved outcome measures in pulmonary arterial hypertension related to systemic sclerosis. *Rheumatology (Oxford)*. 2006;45(12):1455-7.
- du Bois R, King TE Jr. Challenges in pulmonary fibrosis x 5: The NSIP/UIP debate. *Thorax* 2007; 62: 1008-1012.
- du Bois RM, Weycker D, Albera C, et al. Forced vital capacity in patients with idiopathic pulmonary fibrosis: test properties and minimal clinically important difference. *Am J Respir Crit Care Med*. 2011;184(12):1382-9.
- Eakin EG, Resnikoff PM, Prewitt LM, et al. Validation of a new dyspnea measure: the UCSD Shortness of Breath Questionnaire. University of California, San Diego. *Chest*. 1998;113(3):619-24.
- Fink A, Kosecoff J, Chassin M, et al. Consensus methods: characteristics and guidelines for use. <http://www.rand.org/content/dam/rand/pubs/notes/2007/N3367.pdf> Last accessed 3 December 2012.
- Goh NS, Desai SR, Veeraraghavan S, et al. Interstitial lung disease in systemic sclerosis: a simple staging system. *Am J Respir Crit Care Med*. 2008;177(11):1248-54.
- Gresham JN. "Expressed Satisfaction with the Nominal Group Technique Among Change Agents". PhD thesis, 1986. Texas A&M University. Accessed on line last 3 December 2012.
- Holland AE, Hill CJ, Conron M, et al. Short term improvement in exercise capacity and symptoms following exercise training in interstitial lung disease. *Thorax*. 2008;63(6):549-54.
- Jones RM, Hilldrup S, Hope-Gill BD, et al. Mechanical induction of cough in Idiopathic Pulmonary Fibrosis. *Cough*. 2011;10;7:2.
- Key AL, Holt K, Hamilton A, et al. Objective cough frequency in idiopathic pulmonary fibrosis. *Cough*. 2010;6:4.
- Kim DK, Jacobson FL, Washko GR, et al. Clinical and radiographic correlates of hypoxemia and oxygen therapy in the COPD Gene study. *Respir Med*. 2011;105(8):1211-21.
- King TE Jr, Brown KK, Raghu G, et al. BUILD-3: a randomized, controlled trial of bosentan in idiopathic pulmonary fibrosis. *Am J Respir Crit Care Med*. 2011;184(1):92-9.
- King TE Jr, Albera C, Bradford WZ, et al, INSPIRE Study Group. Effect of interferon gamma-1b on survival in patients with idiopathic pulmonary fibrosis (INSPIRE): a multicentre, randomised, placebo-controlled trial. *Lancet* 2009;374(9685):222-8.

- Lota HK, Wells AU. The evolving pharmacotherapy of pulmonary fibrosis. *Expert Opin Pharmacother* 2013;14(1):79-89.
- Martinez FJ, Safrin S, Weycker D, et al; IPF Study Group. The clinical course of patients with idiopathic pulmonary fibrosis. *Ann Intern Med* 2005;142:963-7.
- Manali ED, Lyberopoulos P, Triantafillidou C, et al. MRC chronic Dyspnea Scale: Relationships with cardiopulmonary exercise testing and 6-minute walk test in idiopathic pulmonary fibrosis patients: a prospective study. *BMC Pulm Med*. 2010; 28;10:32.
- Manali ED, Stathopoulos GT, Kollintza A, et al. The Medical Research Council chronic dyspnea score predicts the survival of patients with idiopathic pulmonary fibrosis. *Respir Med*. 2008;102(4):586-92.
- Minnock P, Kirwan J, Bresnihan B. Fatigue is a reliable, sensitive and unique outcome measure in rheumatoid arthritis. *Rheumatology*. 2009;48(12):1533-6.
- Nair R, Aggarwal R, Khanna D: Methods of formal consensus in classification/diagnostic criteria and guideline development. *Semin Arthritis Rheum* 2001; 41: 95-105.
- Nishiyama O, Taniguchi H, Kondoh Y, et al. A simple assessment of dyspnoea as a prognostic indicator in idiopathic pulmonary fibrosis. *Eur Respir J*. 2010;36(5):1067-72.
- O'Donnell DE, Chau LKL, Webb, KA. Qualitative aspects of exertional dyspnea in patients with interstitial lung disease. *J Appl Physiol* 1998;84:2000-9.
- Olson AL, Swigris JJ, Sprunger DB, et al. Rheumatoid arthritis-interstitial lung disease-associated mortality. *Am J Respir Crit Care Med*. 2011;183(3):372-8.
- Patel AS, Siegert RJ, Brignall K, et al. The development and validation of the King's Brief Interstitial Lung Disease (K-BILD) health status questionnaire. *Thorax*. 2012;67(9):804-10
- Pope C, Ziebland S, Mays N. Qualitative research in health care: Analysing qualitative data. *Brit Med J*. 2000;320:114-6.
- Pope J. Measures of systemic sclerosis (scleroderma): Health Assessment Questionnaire (HAQ) and Scleroderma HAQ (SHAQ), physician- and patient-rated global assessments, Symptom Burden Index (SBI), University of California, Los Angeles, Scleroderma Clinical Trials Consortium Gastrointestinal Scale (UCLA SCTC GIT) 2.0, Baseline Dyspnea Index (BDI) and Transition Dyspnea Index (TDI) (Mahler's Index), Cambridge Pulmonary Hypertension Outcome Review (CAMPHOR), and Raynaud's Condition Score (RCS). *Arthritis Care Res*. 2011;63 Suppl 11:S98-111.
- Raghu G, Collard HR, Egan JJ, et al; ATS/ERS/JRS/ALAT Committee on Idiopathic Pulmonary Fibrosis. An official ATS/ERS/JRS/ALAT statement: idiopathic pulmonary fibrosis: evidence-based guidelines for diagnosis and management. *Am J Respir Crit Care Med*. 2011;183(6):788-824.
- RAND Organization. Multiple Articles and Chapters in PDF Format by the RAND Organization.  
[http://www.rand.org/international\\_programs/pardee/pubs/futures\\_method/delphi.html](http://www.rand.org/international_programs/pardee/pubs/futures_method/delphi.html). Last accessed 3 December 2012.
- Ryerson CJ, Abbritti M, Ley B, et al. Cough predicts prognosis in idiopathic pulmonary fibrosis. *Respirology* 2011; 16(6):969-975.

Richeldi L, Costabel U, Selman M, et al. Efficacy of a tyrosine kinase inhibitor in idiopathic pulmonary fibrosis. *N Engl J Med.* 2011;365(12):1079.

Roth MD, Tseng CH, Clements PJ, et al; Scleroderma Lung Study Research Group. Predicting treatment outcomes and responder subsets in scleroderma-related interstitial lung disease. *Arthritis Rheum.* 2011;63(9):2797-808.

Saketkoo LA, Mittoo SM, Frankel S, et al. Reconciling Healthcare Professional and Patient Perspectives in the Development of Disease Activity and Response Criteria in Connective Tissue Disease Related Interstitial Lung Diseases. *J Rheumatol.* In press.

Saketkoo LA, Matteson EL, Brown KK, et al. Developing Disease Activity and Response Criteria in Connective Tissue Disease Related Interstitial Lung Disease. *J Rheumatol.* 2011 Jul;38(7):1514-8.

Seibold JR, Denton C, Furst DE, et al. Randomized, prospective, placebo-controlled trial of bosentan in interstitial lung disease secondary to systemic sclerosis. *Arthritis Rheum.* 2010; 62: 2101-2108.

Singh JA, Yang S, Strand V, et al. Validation of pain and patient global scales in chronic gout: data from two randomised controlled trials. *Ann Rheum Dis.* 2011;70(7):1277-81.

Speight J, Barendse SM. FDA guidance on patient reported outcomes. *BMJ.* 2010;340:c2921.

Steen VD, Medsger TA. The value of the Health Assessment Questionnaire and special patient-generated scales to demonstrate change in systemic sclerosis patients over time. *Arthritis Rheum* 1997 40(11): 1984-91.

Steen VD, Medsger TA. Changes in causes of death in systemic sclerosis, 1972-2002. *Ann Rheum Dis* 2007;66:940-944.

Strand V, Chu AD. Measuring outcomes in systemic lupus erythematosus clinical trials. *Expert Rev Pharmacoecon Outcomes Res.* 2011;11(4):455-68.

Stenton C. The MRC breathlessness scale. *Occup Med (Lond).* 2008;58(3):226-7.

Swigris JJ, Brown KK, Behr J, et al. The SF-36 and SGRQ: validity and first look at minimum important differences in IPF. *Respir Med.* 2010;104(2):296-304.

Swigris JJ, Han M, Vij R, et al. The UCSD shortness of breath questionnaire has longitudinal construct validity in idiopathic pulmonary fibrosis. *Respir Med.* 2012;106(10):1447-55.

Swigris JJ, Kuschner WG, Jacobs SS, et al. Health-related quality of life in patients with idiopathic pulmonary fibrosis: a systematic review. *Thorax.* 2005;60(7):588-94.

Swigris JJ, Stewert AL, Gould MK, et al. Patients' perspectives on how idiopathic pulmonary fibrosis affects the quality of their lives. *Health and Quality of Life Outcomes.* 2005;3:61.

Swigris JJ, Yorke J, Sprunger DB, et al. Assessing dyspnea and its impact on patients with connective tissue disease-related interstitial lung disease. *Respir Med*. 2010;104(9):1350-5.

Tashkin DP, Elashoff R, Clements PJ, et al. Cyclophosphamide versus placebo in scleroderma lung disease. *N Engl J Med*. 2006; 354:2655-66.

Theodore AC, Tseng CH, Li N, et al. Correlation of cough with disease activity and treatment with cyclophosphamide in scleroderma interstitial lung disease: findings from the Scleroderma Lung Study. *Chest*. 2012;142(3):614-21.

Tyndall AJ, Bannert B, Vonk M, et al. Causes and risk factors for death in systemic sclerosis: a study from the EULAR Scleroderma Trials and Research (EUSTAR) database. *Ann Rheum Dis* 2010;69(10):1809-15.

VandeVen AH, Delbecq AL. "The Effectiveness of Nominal, Delphi, and Interacting Group Decision Making Processes", *Acad Manage J*. 1974;17(4):605-621.

Wells AU, Behr J, Costabel U, et al; European IPF Consensus Group. Hot of the breath: mortality as a primary end-point in IPF treatment trials: the best is the enemy of the good. *Thorax*. 2012;67(11):938-40.

Wells AU, Desai SR, Rubens MB, et al. Idiopathic pulmonary fibrosis: a composite physiologic index derived from disease extent observed by computed tomography. *Am J Respir Crit Care Med*. 2003;167(7):962-9.

Winklehner A, Berger N, Maurer B, et al. Screening for interstitial lung disease in systemic sclerosis: the diagnostic accuracy of HRCT image series with high increment and reduced number of slices. *Ann Rheum Dis*. 2012;71(4):549-52.

Yorke J, Jones PW, Swigris JJ. Development and validity testing of an IPF-specific version of the St George's Respiratory Questionnaire. *Thorax*. 2010;65(10):921-6.

Yorke J, Moosavi SH, Shuldham C, et al. Quantification of dyspnoea using descriptors: development and initial testing of the Dyspnoea-12. *Thorax*. 2010;65(1):21-6.

Yorke J, Swigris J, Russell AM, et al. Dyspnea-12 is a valid and reliable measure of breathlessness in patients with interstitial lung disease. *Chest*. 2011;139(1):159-64.
